# Supplementary material
Source: PubMed Central journal article supplement (PMC2896479)

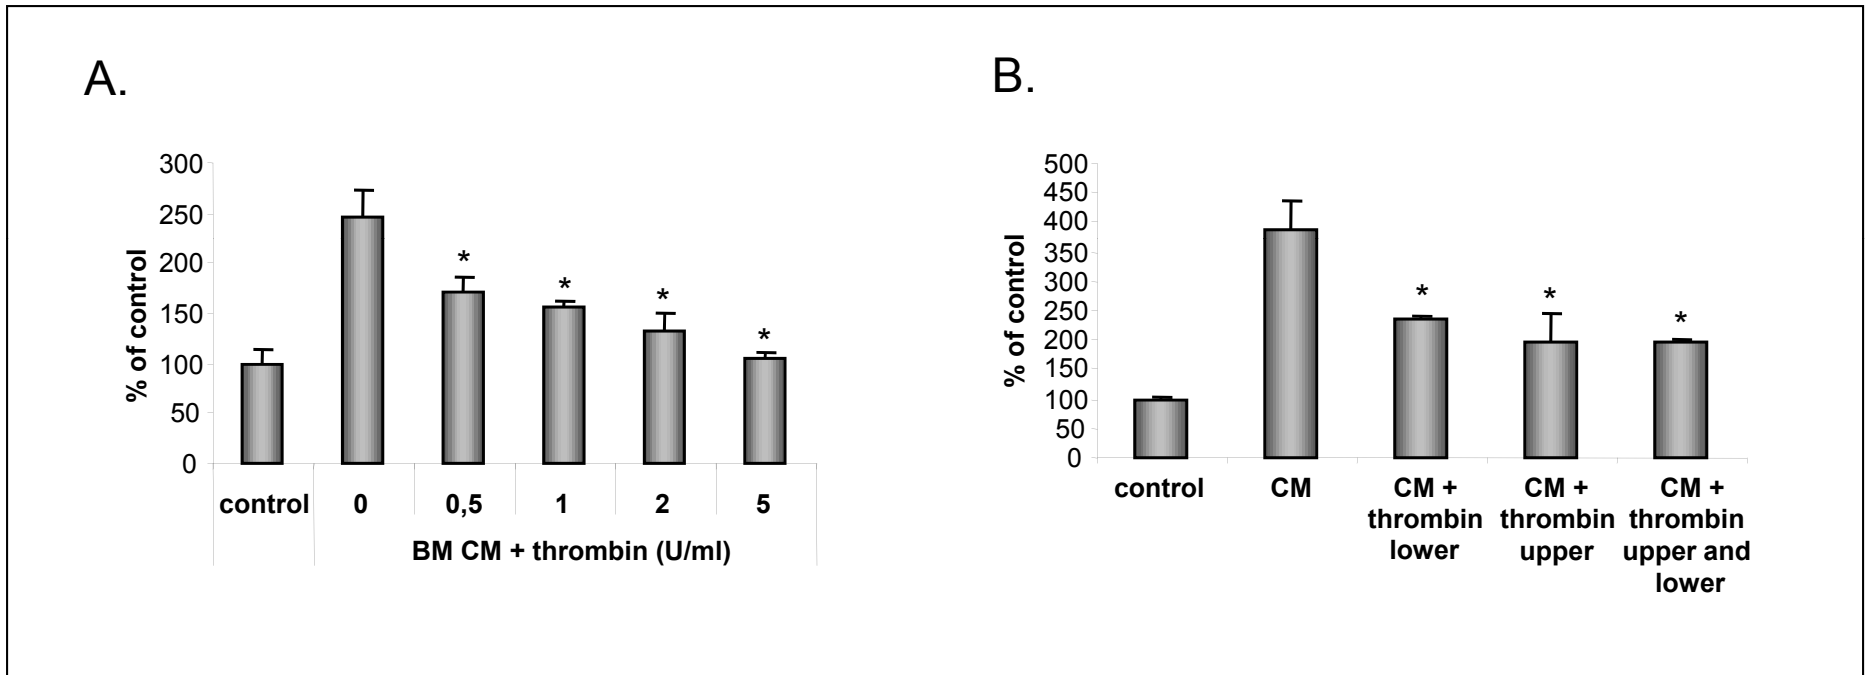

Supplementary Figure 2

Supplement: NIHMS192517-supplement-2.pdf [file NIHMS192517-supplement-2.pdf]
